# Supplementary material for: The Use of Image Guided Programming to Improve Deep Brain Stimulation Workflows with Directional Leads in Parkinson’s Disease
Source: PubMed Central journal article supplement — J Parkinsons Dis. 2024 Jan 23;14(1):111–9. doi: 10.3233/JPD-225126 (PMC10836544; doi:10.3233/jpd-225126), 2024-01-23
Supplement: jpd-14-jpd225126-s001.pdf [file jpd-14-jpd225126-s001.pdf]

# Supplementary Material

## The Use of Image Guided Programming to Improve Deep Brain Stimulation Workflows with Directional Leads in Parkinson's Disease

### 1.5T (Ingenia, Philips, Best, The Netherlands)

|                           | <b>3D T1 Fast Field Echo (3D T1 FFE)</b> | <b>Balanced Fast Field Echo (B-FFE)</b> | <b>T2 Turbo Spin Echo (TSE)</b>  |
|---------------------------|------------------------------------------|-----------------------------------------|----------------------------------|
| <b>Acquisition plane</b>  | Axial                                    | Axial                                   | Axial                            |
| <b>Field of view (mm)</b> | 230x230x180<br>(whole brain)             | 180x180x100<br>(deep gray nuclei)       | 256x256x75<br>(deep gray nuclei) |
| <b>Acquisition Matrix</b> | 256x256x200                              | 360x360x100                             | 288x288x30                       |
| <b>TR (ms)</b>            | 25                                       | 8                                       | 2072                             |
| <b>TE (ms)</b>            | 4.6                                      | 4                                       | 100                              |
| <b>Flip angle (°)</b>     | 30                                       | 50                                      | 90                               |
